# Supplementary material for: Clinical Outcomes of Adults with Systemic Mastocytosis: A 15-Year Multidisciplinary Experience
Source: Cancers (Basel). 2022 Aug 16;14(16):3942. doi: 10.3390/cancers14163942 (PMC9405903; doi:10.3390/cancers14163942)
Supplement: Supplementary file 1 [file cancers-14-03942-s001.zip › cancers-1783931-supplementary.pdf]

## SUPPLEMENTARY MATERIALS

Table S1. Comparison of demographical, clinical and laboratory characteristics of ISM patients with or without major criteria at diagnosis

| Patient characteristics                 | All ISM subjects | ISM without major criterion | ISM with major criterion | p-value |
|-----------------------------------------|------------------|-----------------------------|--------------------------|---------|
| Nr. of subjects, n                      | 169              | 80                          | 89                       | n/a     |
| Age, median (range)                     | 55 (20-84)       | 52 (20-83)                  | 56 (22-84)               | 0.532   |
| Male, n (%)                             | 73 (43.2)        | 27 (33.8)                   | 46 (51.7)                | 0.034   |
| Skin engagement, n (%)                  | 122 (72.1)       | 57 (71.2)                   | 65 (73.0)                | 0.649   |
| Spindle-shaped MCs, n (%)               | 155 (91.7)       | 75 (93.8)                   | 80 (90)                  | 0.064   |
| *KIT D816V positive, n (%)              | 150 (96.8) *     | 74 (98.7)*                  | 75 (93.8)*               | 0.55    |
| CD25/CD2 positive, n (%)                | 167 (98.9)       | 79 (98.8)                   | 88 (98.9)                | NA      |
| Tryptase µg/l, median (range)           | 27.5 (4.3-530)   | 20.5 (4.3-160.0)            | 46 (8-530)               | <0.001  |
| ALP µkat/l, median (IQR)                | 1.1 (0.5-5.7)    | 1.1 (0.5-2.0)               | 1.1 (0.6-5.7)            | 0.154   |
| ALP mg/l, ≥1.9, n (%)                   | 7 ( 6.1)         | 1 ( 2.0)                    | 6 ( 9.5)                 | 0.200   |
| β2microglobulin mg/l, median (range)    | 1.7 (0.9-5.4)    | 1.7 (1.0-4.0)               | 1.7 (0.9-5.4)            | 0.851   |
| β2microglobulin mg/l, ≥2.2, n (%)       | 20 (13.8)        | 9 (12.5)                    | 11 (15.1)                | 0.836   |
| Eosinophils >0.5, median (range), n = 8 | 0.7 (0.5, 1.5)   | 0.7 (0.5, 1.2)              | 1.1 (0.6, 1.5)           | 0.314   |
| Monocytes >0.8, median (range), n = 5   | 1.0 (0.9, 1.7)   | 1.1 (1.0, 1.7)              | 0.9 (0.9, 1.7)           | 0.147   |
| **Osteoporosis, n (%)                   | 32 (22.2 )       | 8 (11.6)                    | 24 (32)                  | 0.002   |

Abbreviations: ISM, indolent systemic mastocytosis; MCs, mast cells; n/a, not-analyzed.

\*Analyzed in 155 patients. \*\*Performed in 133 patients.

Table S2. Clinical characteristics of smouldering SM and aggressive SM patients

| Patient N°, Gender | Diagnosis / year | B(1-3)* and C(1-5)** criteria | Treatment                                                       | Years of follow-up <sup>#</sup> |
|--------------------|------------------|-------------------------------|-----------------------------------------------------------------|---------------------------------|
| 1, F               | SSM/2003         | B1, B2, B3                    | Corticosteroids, Oral cromolyn, H1-antihistamines, Hydroxyurea  | 13                              |
| 2, M               | SSM/2006         | B1, B2                        | Corticosteroids, Oral cromolyn, α-interferon,                   | 14                              |
| 3, M               | SSM/2010         | B1, B2, B3                    | Corticosteroids, α-interferon                                   | 10                              |
| 4, F               | ASM/2014         | C4, C5                        | Corticosteroids, Oral cromolyn, H1-antihistamines               | 2                               |
| 5, M               | ASM/2013         | C1, C4, C5                    | Corticosteroids, Oral cromolyn, H1-antihistamines, Hydroxyurea, | 7                               |
| 6, M               | ASM/2016         | C1, C4, C5                    | Corticosteroids, Oral cromolyn, H1-antihistamines, Midostaurin  | 1                               |
| 7, F               | ASM/2014         | B1, B2, C2, C3, C4            | Midostaurin (for 4 years and still ongoing)                     | 6                               |
| 8, M               | ASM/2015         | B1, B2, C2, C4, C5            | Corticosteroids, Oral cromolyn, H1-antihistamines               | 3                               |
| 9, F               | ASM/2015         | B2, C4, C5                    | Corticosteroids, Oral cromolyn, α-interferon and Cladribine     | 4                               |
| 10, M              | ASM/2010         | C1, C5                        | H1-antihistamines, Chemotherapy and Stem cell transplantation   | 5                               |
| 11, F              | ASM/2010         | B2, C2, C4                    | Corticosteroids, Oral cromolyn, α-interferon                    | 10                              |

Abbreviations: SSM, smoldering systemic mastocytosis; ASM, aggressive systemic mastocytosis.

\*B findings are: B1) High MCs burden on BM biopsy (>30% infiltration), serum tryptase >200 ng/ml; B2) signs of dysplasia or myeloproliferation with normal/slightly abnormal blood counts; B3) mild hepatosplenomegaly, and/or lymphadenopathy (>2 cm by Computerized Tomography or Ultrasound).

\*\*C findings are more severe signs: C1) BM dysfunction with cytopenia, caused by MCs infiltration; C2) hepatosplenomegaly with ascites, elevated liver enzymes, portal hypertension; C3) splenomegaly with hypersplenism; C4) Malabsorption with hypalbuminemia and weight loss; C5) Large osteolytic lesions and/or severe osteoporosis with pathologic fractures.

<sup>#</sup>One patient died of lung cancer, one of unknown cause, and five of unspecified but likely of SM-related cause. Four patients are still alive.
